# Supplementary material for: A metagenomic comparison of clearwater, probiotic, and Rapid BFTTM on Pacific whiteleg shrimp, Litopenaeus vannamei cultures
Source: PeerJ. 2023 Sep 28;11:e15758. doi: 10.7717/peerj.15758 (PMC10542392; doi:10.7717/peerj.15758)
Supplement: Supplemental Information 1 [file peerj-11-15758-s001.xlsx]

## Sheet: Table 1
Supplementary Table 1. Chao1 data of V4 and full length 16S sequencing.
Chao1 - V4 region												Chao1 - Full length 16S
Treatment	sample_id	samples	variable	value	se							Treatment	samples	variable	value	se
SIC	1CW1-SIC	1CW1-SIC	Chao1	62	0							CW	CW1	Chao1	104.909	2.1569
SIC	1CW2-SIC	1CW2-SIC	Chao1	61	0							CW	CW2	Chao1	120	10.3357
SIC	1CW3-SIC	1CW3-SIC	Chao1	52	0							IB	IB8	Chao1	89.875	5.56482
SIP	1P11-SIP	1P11-SIP	Chao1	43	0							IB	IB9	Chao1	97.5	6.35118
SIP	1P12-SIP	1P12-SIP	Chao1	48	0							ICW	ICW1	Chao1	98.5	7.20605
SIP	1P13-SIP	1P13-SIP	Chao1	65	0							ICW	ICW2	Chao1	92.75	7.20009
CW	CW1-CW	CW1-CW	Chao1	39	0							IP	IP11	Chao1	113.6	8.74562
CW	CW2-CW	CW2-CW	Chao1	42	0							IP	IP12	Chao1	105	4.3127
CW	CW3-CW	CW3-CW	Chao1	45	0							PB	PB11	Chao1	113	4.69898
SIB	IB10-SIB	IB10-SIB	Chao1	57	0							PB	PB12	Chao1	118.25	6.36116
SIB	IB8-SIB	IB8-SIB	Chao1	65	0							B_LT20	B_LT20-8	Chao1	112.667	8.00029
SIB	IB9-SIB	IB9-SIB	Chao1	68	0							B_MT20	B_MT20-8	Chao1	108.077	4.0362
PW	PB11-PW	PB11-PW	Chao1	66	0							B_LT20	B_LT20-9	Chao1	125.625	22.0214
PW	PB12-PW	PB12-PW	Chao1	76	0							B_MT20	B_MT20-9	Chao1	104.667	6.41366
PW	PB13-PW	PB13-PW	Chao1	61	0
LT20uM	T10-LT20uM	T10-LT20uM	Chao1	77	0
MT20uM	T10-MT20uM	T10-MT20uM	Chao1	107	0
LT20uM	T8-LT20uM	T8-LT20uM	Chao1	86	0
MT20uM	T8-MT20uM	T8-MT20uM	Chao1	104	0
LT20uM	T9-LT20uM	T9-LT20uM	Chao1	65	0
MT20uM	T9-MT20uM	T9-MT20uM	Chao1	97	0
p-value: 1.229e-05; [ANOVA] F-value: 16.619												p-value: 0.037128; [ANOVA] F-value: 4.3749
