# Supplementary material for: A metagenomic comparison of clearwater, probiotic, and Rapid BFTTM on Pacific whiteleg shrimp, Litopenaeus vannamei cultures
Source: PeerJ. 2023 Sep 28;11:e15758. doi: 10.7717/peerj.15758 (PMC10542392; doi:10.7717/peerj.15758)
Supplement: Supplemental Information 2 [file peerj-11-15758-s002.xlsx]

## Sheet: Table 1
Supplementary Table 2. LefSe analysis based on phylum and genus using 16S V4 region and full length 16S sequences.
LefSe - V4 region (Phylum)												LefSe - Full length 16S (Phylum)
	Pvalues	FDR	SIC	SIP	SIB	CW	PW	LT20uM	MT20uM	LDAscore			Pvalues	FDR	SIC	SIP	SIB	CW	PW	LT20uM	MT20uM	LDAscore
p__Myxococcota	0.014756	0.047779	868.11	0	0	160700	222200	344220	887250	5.65		unclassified_Bacteria	0.070368	0.28205	584.86	951.19	0	30857	29461	104500	74881	4.72
p__Gemmatimonadota	0.016148	0.047779	0	0	0	4046.3	201980	35310	78609	5		p__Actinobacteriota	0.11094	0.28205	799790	370270	196600	1214000	396430	451240	1048600	5.71
p__Bdellovibrionota	0.018541	0.047779	447.94	0	0	41474	42570	298810	66560	5.17		p__Myxococcota	0.12815	0.28205	0	1390.7	932.84	58671	42730	15241	101420	4.71
p__Actinobacteriota	0.019262	0.047779	833430	28603	45724	724620	89682	181110	222830	5.6		p__Cyanobacteria	0.15374	0.28205	3348.4	536130	7439.9	17222	30443	2689.6	13953	5.43
p__Desulfobacterota	0.026042	0.047779	0	0	17408	0	50326	34441	37474	4.4		p__Planctomycetota	0.17519	0.28205	13394	47566	98148	8493.1	46894	95737	257780	5.1
p__Planctomycetota	0.026602	0.047779	140500	306390	1815700	33296	407860	608260	1123100	5.95		p__Proteobacteria	0.19915	0.28205	8213000	8820200	9074000	7699400	8467800	8611700	7381500	5.93
p__Chloroflexota	0.027871	0.047779	0	0	29016	0	18713	27704	69064	4.54		p__Bacteroidota	0.22183	0.28205	770710	135230	512770	799460	886500	676410	1081000	5.67
p__Cyanobacteria	0.11176	0.15643	5126.2	259900	63386	0	154940	186250	98186	5.11		p__Firmicutes_A	0.25071	0.28205	5103	8272.1	5130.6	47843	51721	8965.4	13089	4.37
p__Proteobacteria	0.12356	0.15643	7201500	8808600	7078300	8167600	7951000	6711900	5982100	6.15		p__Verrucomicrobiota	0.28302	0.28302	194060	80012	104980	123970	48020	33555	27759	4.92
p__Patescibacteria	0.13036	0.15643	0	0	1378.6	10938	22874	12069	26787	4.13
p__Verrucomicrobiota	0.16664	0.18179	1004500	277980	423720	411550	196690	792330	318780	5.61
p__Bacteroidota	0.31965	0.31965	813660	318540	525390	445780	641200	767600	1089200	5.59
LefSe - V4 region (Genus)												LefSe -Full length 16S (Genus)
	Pvalues	FDR	SIC	SIP	SIB	CW	PW	LT20uM	MT20uM	LDAscore			Pvalues	FDR	SIC	SIP	SIB	CW	PW	LT20uM	MT20uM	LDAscore
g__SWB02	0.0047265	0.064366	0	0	0	3762.8	130460	63421	125400	4.81		unclassified_Nisaeaceae	0.055037	0.30544	1129.5	0	0	63332	15872	105390	5753.8	4.72
g__UBA4421	0.0059694	0.064366	0	0	0	0	62800	60301	65533	4.52		unclassified_Caulobacterales	0.05906	0.30544	544.66	0	0	15010	72017	14472	74083	4.57
g__Maritimibacter	0.0077089	0.064366	95016	12603	92926	0	136490	0	55248	4.83		g__Shewanella	0.064293	0.30544	154370	177010	871.69	769530	11882	6595.8	3667.5	5.58
g__Agarivorans	0.0082365	0.064366	71292	2313.8	0	424960	8108.8	0	0	5.33		unclassified_Rhodobacteraceae	0.065904	0.30544	1029700	884350	1676000	331450	409850	504260	455550	5.83
g__Marivita	0.0093418	0.064366	0	0	18513	109390	0	347120	10641	5.24		g__Hyphomonas	0.068287	0.30544	0	0	0	19256	53369	5379.2	5395.2	4.43
g__Algoriphagus	0.009683	0.064366	53984	2585.2	0	31655	0	0	2608.7	4.43		unclassified_Bacteria	0.070368	0.30544	584.86	951.19	0	30857	29461	104500	74881	4.72
g__Marinagarivorans	0.010041	0.064366	3917.6	0	0	64534	49250	38886	62170	4.51		unclassified_Schleiferiaceae	0.070368	0.30544	544.66	439.52	2798.5	75649	23158	26703	48850	4.58
g__CAADGM01	0.010218	0.064366	0	0	0	0	16663	5014.9	5257.4	3.92		unclassified_Parvularculaceae	0.07413	0.30544	0	0	871.69	4067.5	205500	11975	48052	5.01
g__Phaeodactylibacter	0.012105	0.064366	0	0	0	0	36845	181380	140520	4.96		g__Lewinella_A	0.074832	0.30544	0	3588.3	466.42	57353	38827	26320	67496	4.53
g__Arctic95D_9	0.01271	0.064366	29691	0	21705	0	0	6587.6	23875	4.17		g__Paracoccus	0.079135	0.30544	10085	26778	223810	10047	8268.6	12038	40717	5.03
g__Pseudohongiella	0.013112	0.064366	0	0	0	0	117880	112930	210710	5.02		g__Arachnia	0.083999	0.30544	36189	439.52	2332.1	12081	1387.7	0	4172.7	4.26
g__Shewanella	0.013291	0.064366	2455400	526350	7287.1	3651500	155690	43316	53633	6.26		unclassified_Sphingomonadaceae	0.087497	0.30544	4437.7	6074.5	932.84	69312	75603	35282	55745	4.57
g__Catenovulum	0.013496	0.064366	0	0	0	126110	40626	267310	139680	5.13		g__Hirschia	0.091175	0.30544	0	511.67	0	1195.9	54615	48987	53724	4.44
g__Microbacterium	0.017173	0.076051	0	0	0	509160	58468	14403	0	5.41		g__Pararheinheimera	0.094758	0.30544	230910	203280	257700	847780	2257400	2772800	1011400	6.11
g__UBA1924	0.025869	0.098025	0	0	0	0	35449	24270	52227	4.42		g__Ruegeria	0.096656	0.30544	5852200	5144400	5459000	3488900	3334900	3151100	3458800	6.13
g__Demequina	0.026132	0.098025	0	15082	25842	0	0	13443	104780	4.72		g__Catenovulum	0.1008	0.30544	0	0	0	43596	2717.7	9285.4	8557.5	4.34
g__UJ101	0.030718	0.098025	3255.4	33392	34636	0	0	0	0	4.24		g__Thioclava	0.10294	0.30544	20957	8632.8	4014.3	1195.9	2659.9	0	3308.8	4.02
g__AV2	0.030718	0.098025	0	0	0	57282	0	173270	4927.5	4.94		g__Vibrio	0.1046	0.30544	79688	426160	115320	270400	47558	35285	31573	5.3
g__Hyphomonas	0.03081	0.098025	0	0	0	8600.8	154890	14615	20881	4.89		g__Demequina	0.10879	0.30544	639050	237200	28245	405410	210470	200240	368370	5.48
g__2011_GWC2_44_17	0.033675	0.098025	0	0	0	0	16652	5632	20299	4.01		g__Rhodopirellula_B	0.11094	0.30544	12264	32189	43110	6459.3	31022	13255	52468	4.36
g__Bin80	0.033842	0.098025	0	0	0	0	74587	33646	58252	4.57		g__Fluviibacterium	0.11322	0.30544	24367	3293.1	18451	0	0	4226.2	47871	4.38
g__Phaeovulum	0.037731	0.098025	61764	51496	129310	0	186170	64791	82128	4.97		g__Photobacterium	0.11762	0.30544	194860	963720	248240	295220	118590	65125	114720	5.65
g__Pseudoalteromonas	0.037793	0.098025	725770	233880	134970	344090	397020	1493900	1120000	5.83		unclassified_Emcibacteraceae	0.11804	0.30544	0	439.52	871.69	10706	4654.9	55197	16039	4.44
g__Gimesia	0.038988	0.098025	8756.1	61980	157690	0	11851	93166	49191	4.9		g__Microbacterium	0.12815	0.30544	0	879.04	14337	1195.9	11536	8195.8	430050	5.33
g__GCA_2683825	0.039591	0.098025	2842.2	12367	10445	0	3118.8	10620	65338	4.51		g__Sorangium	0.12815	0.30544	0	1390.7	932.84	58671	42730	15241	101420	4.71
g__Rheinheimera	0.042314	0.098025	80674	36993	3348.1	0	1186100	503850	737440	5.77		g__Actibacterium	0.13461	0.30544	11134	120120	302680	2212.8	13386	56474	68164	5.18
g__Seonamhaeicola	0.042688	0.098025	441870	32532	55262	158620	0	18714	111590	5.34		g__Pseudohongiella	0.14046	0.30544	0	0	0	30857	37959	17931	31426	4.28
g__Paracoccus	0.044397	0.098308	0	21974	338520	0	0	22158	81570	5.23		g__Psychromonas	0.14254	0.30544	105950	364960	249740	442990	307090	249610	184980	5.23
g__OLB9	0.049696	0.10625	0	0	0	3762.8	8904.7	22591	95917	4.68		g__Tropicimonas	0.1657	0.34262	119430	4979	8273.2	3229.6	722.75	3009.6	7269.5	4.77
g__SZUA_592	0.0547	0.11004	0	82461	170940	0	172610	91812	188460	4.97		g__Halioglobus	0.17198	0.34262	7402.2	21740	11416	23145	90606	75436	169440	4.91
g__Vibrio	0.055019	0.11004	941980	3742700	3130800	2310900	2107800	658580	516790	6.21		g__Formosa	0.17702	0.34262	0	8934.7	50595	0	5001.5	10885	50821	4.41
g__SZUA_42	0.059208	0.11285	33984	37751	1440300	12948	24552	58113	164210	5.85		g__Cryobacterium	0.19557	0.34568	120030	124070	144120	704880	156700	239160	228400	5.47
Not_Assigned	0.060065	0.11285	3670100	1910800	2861000	1208600	3108900	3878900	4206200	6.18		g__Limnospira	0.19706	0.34568	2259.1	342860	1743.4	4604.5	15265	1793.1	2086.4	5.23
g__Planctomicrobium	0.070322	0.12727	72305	81246	47048	0	72263	16052	97696	4.69		g__Clostridioides	0.20083	0.34568	1129.5	2341.9	0	20395	21770	5379.2	12225	4.04
g__M0603	0.073591	0.12727	0	0	0	41474	0	232370	19710	5.07		g__Clostridium	0.20165	0.34568	3973.4	5930.2	5130.6	27448	29951	3586.2	863.86	4.16
g__Maribacter	0.073899	0.12727	22040	38405	26705	0	79139	97244	103530	4.71		g__Nitrosomonas	0.20913	0.34854	3348.4	4172.1	466.42	54782	34376	8965.4	4890	4.43
g__SZUA_309	0.081456	0.13649	0	13762	7769.9	0	26821	14213	134520	4.83		g__Croceibacterium	0.22581	0.34908	6232.5	16328	25768	22665	39319	31442	49355	4.33
g__Ilumatobacter_A	0.096474	0.15741	14921	4847.3	0	9675.9	0	0	1159.4	3.87		unclassified_Flavobacteriaceae	0.22985	0.34908	692350	64189	226050	547510	629300	409710	616680	5.5
g__SZUA_55	0.10401	0.16535	0	0	0	0	7807.7	11031	16174	3.91		g__Neptunomonas	0.23229	0.34908	0	511.67	0	63698	34868	44827	8557.5	4.5
g__Nocardioides	0.11001	0.17052	4747.7	0	9612.9	0	0	0	8203.1	3.68		unclassified_Gammaproteobacteria	0.23395	0.34908	33926	49692	68946	115840	159300	43478	160500	4.8
g__Roseibacillus	0.11874	0.17832	108420	0	59510	30192	0	21723	14014	4.73		unclassified_Alphaproteobacteria	0.23854	0.34908	0	511.67	0	0	36167	5379.2	19560	4.26
g__Tenacibaculum	0.12239	0.17832	0	0	1780.5	0	0	23306	54948	4.44		g__Maribacter	0.26431	0.36916	5223.6	17640	13626	13098	39289	57185	63617	4.47
g__GCA_2699125	0.12368	0.17832	0	0	29016	0	0	4320.9	24623	4.16		g__Aliiroseovarius	0.26811	0.36916	2259.1	11860	14130	1195.9	2775.5	6082.7	2445	3.81
g__Promineofilum	0.13236	0.18651	0	0	0	0	18713	23383	44440	4.35		g__Pseudoalteromonas	0.27825	0.36916	133380	182550	149220	302330	495690	612970	649660	5.41
g__Simiduia	0.13958	0.19231	35170	5816.8	0	2687.7	20014	17284	37148	4.27		g__Tamlana_A	0.27825	0.36916	41145	2341.9	11943	56995	59847	41299	53983	4.46
g__Hanstruepera	0.1538	0.2073	0	0	6105.4	0	62319	25843	20024	4.49		unclassified_Akkermansiaceae	0.28302	0.36916	194060	80012	104980	123970	48020	33555	27759	4.92
g__Mycobacterium	0.16657	0.21201	1784.8	0	6932.3	87594	22729	113330	20480	4.75		g__Gimesia	0.29469	0.3762	0	14865	54167	0	6215.9	24207	11508	4.43
g__Halobacteriovorax	0.1667	0.21201	447.94	0	0	0	42570	66437	46849	4.52		g__Nodosilinea	0.31778	0.38965	1089.3	193270	5696.5	12618	15178	896.54	11866	4.98
g__T3Sed10_241	0.16838	0.21201	8404.5	23913	0	5273.3	0	0	10829	4.08		unclassified_Francisellaceae	0.31821	0.38965	71427	53136	73206	273730	277340	551110	363090	5.4
g__Pirellula_B	0.17098	0.21201	0	0	14455	0	0	6587.6	8240.9	3.86		unclassified_Phycisphaerales	0.32523	0.39028	1129.5	511.67	871.69	2033.8	9656.4	58275	193810	4.99
g__Haloferula	0.1942	0.23609	411200	181110	106790	161950	188890	81669	81976	5.22		unclassified_Sedimenticolaceae	0.35089	0.41281	27613	18965	45059	43539	9338	5699.2	31376	4.29
g__Muricauda	0.19853	0.23671	13519	49753	15098	21707	64908	16883	46333	4.41		g__Winogradskyella	0.37695	0.42212	5143.2	4093.3	1338.1	5621.4	39204	55585	46829	4.43
g__Lysobacter	0.22227	0.26001	94182	12280	27725	49893	0	32647	41159	4.67		unclassified_Ilumatobacteraceae	0.3799	0.42212	4518.1	7688.3	7562.2	90480	16334	3649.6	17620	4.64
g__GCA_2723275	0.23024	0.26435	7629.4	3151.6	3306.6	0	0	4791	0	3.58		unclassified_Cyclobacteriaceae	0.3799	0.42212	17809	12503	186790	31638	21857	29903	101980	4.94
g__UBA8437	0.24408	0.27505	0	11206	15767	0	61751	19503	19985	4.49		g__Lysobacter	0.39201	0.42764	20251	2414	20056	32117	5493.2	7299.3	32680	4.18
g__Photobacterium	0.24843	0.27505	427710	2506100	702740	510630	795190	675230	221610	6.06		g__Rhodobacter	0.42962	0.46031	40564	53844	27550	9209.1	36139	4482.7	30204	4.39
g__Halioglobus	0.2535	0.27574	52806	135760	163640	53053	134100	19204	155020	4.86		g__Mesorhizobium	0.56226	0.58935	22733	42666	62073	21591	109080	40471	109890	4.64
g__Rhodopirellula_B	0.35729	0.38193	14332	23219	46491	0	0	4425.1	38261	4.37		g__Pseudomonas_A	0.56971	0.58935	1169.7	17252	3203.8	6817.3	64619	5699.2	4531.3	4.5
g__Tropicibacter	0.38047	0.39982	0	18097	21121	0	0	20961	28150	4.15		g__Wenzhouxiangella	0.69214	0.69986	2884.1	9813.8	6063.4	8493.1	38075	3906.2	18500	4.25
g__Confluentibacter	0.40466	0.41815	18282	9255.2	0	0	59365	74617	69994	4.57		g__Muricauda	0.69986	0.69986	8491.5	21497	19162	11601	30010	18827	30725	4.05
g__BBD_1991_12	0.55652	0.56564	11811	17689	7636.1	0	17809	11031	10725	3.95
g__Formosa	0.58844	0.58844	0	47104	47262	0	23757	43209	48696	4.39
