# Supplementary material for: A metagenomic comparison of clearwater, probiotic, and Rapid BFTTM on Pacific whiteleg shrimp, Litopenaeus vannamei cultures
Source: PeerJ. 2023 Sep 28;11:e15758. doi: 10.7717/peerj.15758 (PMC10542392; doi:10.7717/peerj.15758)
Supplement: Supplemental Information 3 [file peerj-11-15758-s003.xlsx]

## Sheet: Table 2
Supplementary Table 3. Pearson's correlation analysis of Vibrio genus and individual Vibrio species.
V4 - genus Vibrio						full length 16S - genus Vibrio						full length 16S - Vibrio parahaemolyticus						full length 16S - Vibrio harveyi						full length 16S - Vibrio vulnificus
	Correlation	T-Stat	P-Value	FDR			Correlation	T-Stat	P-Value	FDR			Correlation	T-Stat	P-Value	FDR			Correlation	T-Stat	P-Value	FDR			Correlation	T-Stat	P-Value	FDR
g__2011_GWC2_44_17	-0.16565	-0.73219	0.47299	0.70399		g__Vibrio	1	Inf	0	0		s__Vibrio_parahaemolyticus	1	Inf	0	0		s__Vibrio_harveyi	1	164380000	1.7303e-93	1.1766e-91		s__Vibrio_vulnificus	1	Inf	0	0
g__Agarivorans	0.053506	0.23356	0.81782	0.90243		g__Photobacterium	0.90927	7.5677	6.6092e-06	0.00019828		s__Shewanella_algae	0.93501	9.1335	9.4484e-07	3.2125e-05		s__Ruegeria_sp013112245	0.92589	8.4899	2.0356e-06	6.9209e-05		unclassified_Vibrio	0.88497	6.5836	2.599e-05	0.00088368
g__Algoriphagus	-0.067664	-0.29562	0.77073	0.86538		g__Limnospira	0.82065	4.975	0.00032257	0.0064514		s__Photobacterium_damselae	0.92625	8.513	1.9788e-06	4.4852e-05		s__Photobacterium_damselae	0.90559	7.3961	8.318e-06	0.00018854		s__Shewanella_algae	0.81354	4.8463	0.00040074	0.0090833
g__Arctic95D_9	-0.35313	-1.6453	0.11636	0.35461		g__Shewanella	0.47686	1.8793	0.084696	0.92394		s__Limnospira_fusiformis	0.92007	8.1357	3.1637e-06	5.3782e-05		s__Vibrio_parahaemolyticus	0.76572	4.1242	0.0014101	0.023972		s__Vibrio_parahaemolyticus	0.77332	4.2253	0.0011778	0.020023
g__AV2	-0.27523	-1.2479	0.22723	0.51939		unclassified_Flavobacteriaceae	-0.45299	-1.7602	0.10382	0.92394		unclassified_Vibrio	0.89246	6.8529	1.765e-05	0.00024004		unclassified_Vibrio	0.72131	3.6076	0.0035954	0.045809		s__Limnospira_fusiformis	0.66343	3.0715	0.0096906	0.13179
g__BBD_1991_12	-0.0043752	-0.019071	0.98498	0.98498		unclassified_Bacteria	-0.41331	-1.5723	0.14186	0.92394		s__Vibrio_vulnificus	0.77332	4.2253	0.0011778	0.013348		unclassified_Nodosilinea	0.71511	3.5439	0.004042	0.045809		s__Photobacterium_damselae	0.63807	2.8706	0.014073	0.1595
g__Bin80	-0.23514	-1.0545	0.30488	0.59409		g__Nodosilinea	0.41286	1.5702	0.14234	0.92394		s__Vibrio_harveyi	0.76572	4.1242	0.0014101	0.013698		s__Shewanella_algae	0.62083	2.7433	0.017822	0.17313		s__Shewanella_khirikhana	0.5638	2.3648	0.035741	0.34507
g__CAADGM01	-0.29208	-1.3312	0.19888	0.48955		g__Psychromonas	0.41139	1.5636	0.1439	0.92394		s__Ruegeria_sp013112245	0.62679	2.7866	0.016448	0.13981		s__Limnospira_fusiformis	0.60451	2.6288	0.022025	0.17467		s__Vibrio_harveyi	0.55222	2.2946	0.040596	0.34507
g__Catenovulum	-0.2546	-1.1476	0.26538	0.56615		g__Hirschia	-0.39429	-1.4863	0.163	0.92394		unclassified_Flavobacteriaceae	-0.51158	-2.0625	0.061501	0.46467		s__Pararheinheimera_sp003990335	-0.60066	-2.6025	0.023118	0.17467		s__Catenovulum_sediminis	0.51745	2.0947	0.058087	0.43888
g__Confluentibacter	-0.35722	-1.6671	0.11189	0.35461		g__Pararheinheimera	-0.38673	-1.4527	0.17194	0.92394		unclassified_Nodosilinea	0.45341	1.7622	0.10346	0.70353		unclassified_Bacteria	-0.58836	-2.5206	0.026879	0.18278		s__Ruegeria_sp013112245	0.46559	1.8224	0.093391	0.59591
g__Demequina	-0.2165	-0.96664	0.34587	0.59826		g__Tamlana_A	-0.37245	-1.3902	0.1897	0.92394		unclassified_Tamlana_A	-0.44034	-1.6989	0.11508	0.71143		unclassified_Tamlana_A	-0.57021	-2.4045	0.033245	0.20551		unclassified_Nitrosomonas	0.45947	1.792	0.09836	0.59591
g__Formosa	0.14178	0.6243	0.53986	0.73531		g__Croceibacterium	-0.36528	-1.3593	0.19905	0.92394		unclassified_Bacteria	-0.37214	-1.3889	0.19011	0.92997		s__Vibrio_vulnificus	0.55222	2.2946	0.040596	0.23004		s__Neptunomonas_phycophila	0.44661	1.7291	0.1094	0.59591
g__GCA_2683825	-0.15211	-0.67085	0.51039	0.72589		unclassified_Caulobacterales	-0.33407	-1.2278	0.24306	0.92394		s__Rhodobacter_capsulatus	0.33679	1.239	0.23902	0.92997		unclassified_Hirschia	-0.52797	-2.1535	0.052312	0.26118		unclassified_Cryobacterium	0.4416	1.705	0.11392	0.59591
g__GCA_2699125	0.11916	0.52314	0.60692	0.73534		g__Rhodobacter	0.31269	1.1404	0.27638	0.92394		s__Pararheinheimera_sp003990335	-0.33576	-1.2348	0.24055	0.92997		unclassified_Ruegeria	0.52523	2.1381	0.053772	0.26118		s__Psychromonas_sp000153405	0.42221	1.6134	0.13262	0.64417
g__GCA_2723275	-0.13231	-0.58182	0.56753	0.73531		g__Fluviibacterium	-0.30103	-1.0935	0.29563	0.92394		unclassified_Hirschia	-0.32196	-1.178	0.26162	0.92997		s__Ruegeria_sp013033515	0.49968	1.9983	0.068859	0.31216		unclassified_Ilumatobacteraceae	0.41126	1.5629	0.14404	0.65298
g__Gimesia	-0.21962	-0.98126	0.3388	0.59826		g__Winogradskyella	-0.29053	-1.0518	0.31362	0.92394		unclassified_Croceibacterium	-0.31992	-1.1697	0.26483	0.92997		s__Psychromonas_sp000153405	0.49125	1.9538	0.074439	0.31637		s__Actibacterium_pelagium	-0.39066	-1.4701	0.16726	0.71084
g__Halioglobus	0.3887	1.8389	0.081608	0.35461		unclassified_Emcibacteraceae	-0.2858	-1.0331	0.32192	0.92394		unclassified_Emcibacteraceae	-0.28537	-1.0314	0.32268	0.92997		s__Rhodobacter_capsulatus	0.45188	1.7547	0.10478	0.38002		s__Ruegeria_atlantica_A	-0.37362	-1.3953	0.1882	0.75282
g__Halobacteriovorax	-0.13213	-0.58105	0.56804	0.73531		g__Maribacter	-0.27906	-1.0067	0.33396	0.92394		unclassified_Demequina	-0.28418	-1.0267	0.32479	0.92997		unclassified_Flavobacteriaceae	-0.45106	-1.7508	0.10549	0.38002		unclassified_Rhodobacteraceae	-0.33548	-1.2336	0.24096	0.91029
g__Haloferula	-0.18469	-0.81913	0.42287	0.66009		g__Formosa	-0.26712	-0.96023	0.35589	0.92394		unclassified_Caulobacterales	-0.28155	-1.0164	0.32948	0.92997		unclassified_Emcibacteraceae	-0.45026	-1.7469	0.10618	0.38002		s__Fluviibacterium_aquatile	-0.3182	-1.1627	0.26755	0.91987
g__Hanstruepera	0.10243	0.44886	0.65861	0.78058		unclassified_Parvularculaceae	-0.2491	-0.89098	0.39045	0.92394		s__Fluviibacterium_aquatile	-0.26821	-0.96443	0.35386	0.92997		s__Winogradskyella_sp013394635	-0.40937	-1.5543	0.14607	0.49665		unclassified_Formosa	-0.31277	-1.1407	0.27626	0.91987
g__Hyphomonas	-0.24761	-1.114	0.27917	0.57636		unclassified_Alphaproteobacteria	-0.23975	-0.85547	0.40905	0.92394		unclassified_Sphingomonadaceae	-0.26016	-0.93335	0.36904	0.92997		unclassified_Sphingomonadaceae	-0.39541	-1.4913	0.1617	0.50677		unclassified_Schleiferiaceae	0.29416	1.0662	0.30733	0.91987
g__Ilumatobacter_A	0.035111	0.15314	0.8799	0.95447		g__Microbacterium	-0.23877	-0.85177	0.41102	0.92394		s__Psychromonas_sp000153405	0.25672	0.92016	0.37562	0.92997		unclassified_Caulobacterales	-0.39347	-1.4826	0.16395	0.50677		unclassified_Caulobacterales	-0.26765	-0.96227	0.35491	0.91987
g__Litorilinea	-0.35586	-1.6598	0.11337	0.35461		g__Halioglobus	-0.22899	-0.81491	0.431	0.92394		unclassified_Tropicimonas	-0.24137	-0.86161	0.40579	0.92997		unclassified_Akkermansiaceae	0.34183	1.26	0.23161	0.55344		unclassified_Mesorhizobium	-0.2671	-0.96013	0.35594	0.91987
g__Lysobacter	-0.25545	-1.1517	0.26373	0.56615		unclassified_Sphingomonadaceae	-0.22186	-0.7882	0.44587	0.92394		unclassified_Lewinella_A	-0.23372	-0.83269	0.42128	0.92997		unclassified_Lewinella_A	-0.33903	-1.2484	0.23571	0.55344		unclassified_Tropicimonas	-0.2583	-0.92621	0.37259	0.91987
g__M0603	-0.28339	-1.2881	0.21319	0.50534		g__Ruegeria	0.21853	0.77578	0.4529	0.92394		s__Winogradskyella_sp013394635	-0.23206	-0.82643	0.42469	0.92997		s__Pseudoalteromonas_spongiae	-0.33811	-1.2445	0.23706	0.55344		s__Aliiroseovarius_crassostreae	-0.25518	-0.91425	0.37859	0.91987
g__Maribacter	-0.39	-1.8461	0.080513	0.35461		unclassified_Francisellaceae	-0.18733	-0.66061	0.52134	0.92394		s__Ruegeria_sp009363615	-0.22864	-0.81358	0.43174	0.92997		unclassified_Microbacterium	-0.33664	-1.2384	0.23923	0.55344		unclassified_Alphaproteobacteria	-0.25357	-0.90807	0.38171	0.91987
g__Marinagarivorans	-0.3839	-1.8122	0.085785	0.35461		unclassified_Phycisphaerales	-0.18675	-0.65851	0.52264	0.92394		unclassified_Muricauda	0.22836	0.81254	0.4323	0.92997		s__Aliiroseovarius_crassostreae	0.33267	1.222	0.24516	0.55344		unclassified_Croceibacterium	-0.25072	-0.89719	0.38726	0.91987
g__Maritimibacter	-0.23135	-1.0366	0.31295	0.59409		unclassified_Cyclobacteriaceae	-0.18066	-0.63628	0.53654	0.92394		unclassified_Arachnia	-0.21537	-0.76398	0.45964	0.92997		unclassified_Nisaeaceae	-0.32855	-1.205	0.25142	0.55344		unclassified_Parvularculaceae	-0.24667	-0.88173	0.39524	0.91987
g__Marivita	-0.34264	-1.5898	0.12839	0.35725		g__Pseudoalteromonas	-0.17692	-0.6227	0.54513	0.92394		s__Ruegeria_sp013033515	0.21341	0.75672	0.46382	0.92997		unclassified_Maribacter	-0.32591	-1.1942	0.25548	0.55344		unclassified_Paracoccus	-0.23004	-0.81883	0.42884	0.91987
g__Microbacterium	0.086521	0.37855	0.70922	0.82527		g__Demequina	-0.17499	-0.61568	0.5496	0.92394		unclassified_Maribacter	-0.21007	-0.74431	0.47101	0.92997		unclassified_Croceibacterium	-0.3256	-1.1929	0.25596	0.55344		s__Ruegeria_sp009363615	-0.22873	-0.81393	0.43154	0.91987
g__Muricauda	0.17015	0.75263	0.4609	0.70232		g__Hyphomonas	-0.1749	-0.61536	0.54981	0.92394		unclassified_Francisellaceae	-0.20572	-0.72819	0.48046	0.92997		unclassified_Formosa	-0.32483	-1.1898	0.25714	0.55344		s__Clostridioides_difficile	0.22113	0.78545	0.44742	0.91987
g__Mycobacterium	-0.12996	-0.57134	0.57446	0.73531		g__Lewinella_A	-0.17172	-0.60382	0.5572	0.92394		unclassified_Nisaeaceae	-0.20096	-0.71063	0.4909	0.92997		s__Fluviibacterium_aquatile	-0.32271	-1.1811	0.26044	0.55344		unclassified_Hirschia	-0.22046	-0.78297	0.44882	0.91987
g__Nocardioides	0.072859	0.31843	0.75363	0.86129		g__Pseudohongiella	-0.17099	-0.60117	0.55891	0.92394		unclassified_Parvularculaceae	-0.19906	-0.70363	0.49509	0.92997		unclassified_Thioclava	0.31287	1.1411	0.27609	0.56892		unclassified_Wenzhouxiangella	-0.21813	-0.77428	0.45375	0.91987
g__OLB9	-0.36379	-1.7024	0.10499	0.35461		unclassified_Gammaproteobacteria	-0.16713	-0.58722	0.56794	0.92394		unclassified_Microbacterium	-0.19859	-0.70192	0.49612	0.92997		s__Shewanella_khirikhana	0.29379	1.0647	0.30796	0.61048		unclassified_Flavobacteriaceae	-0.21451	-0.76079	0.46147	0.91987
g__Paracoccus	0.38066	1.7943	0.088688	0.35461		g__Mesorhizobium	-0.16498	-0.57944	0.57301	0.92394		unclassified_Alphaproteobacteria	-0.18453	-0.65039	0.5277	0.92997		unclassified_Cyclobacteriaceae	-0.29018	-1.0504	0.31422	0.61048		unclassified_Rhodopirellula_B	-0.2061	-0.72963	0.47962	0.91987
g__Phaeodactylibacter	-0.38039	-1.7929	0.088928	0.35461		unclassified_Nisaeaceae	-0.15841	-0.55578	0.58857	0.92394		unclassified_Ruegeria	0.18384	0.6479	0.52925	0.92997		unclassified_Lysobacter	-0.27663	-0.9972	0.33835	0.62834		unclassified_Cyclobacteriaceae	-0.19731	-0.69721	0.49896	0.91987
g__Phaeovulum	0.11849	0.52016	0.60896	0.73534		g__Tropicimonas	-0.15838	-0.55567	0.58865	0.92394		unclassified_Halioglobus	-0.18372	-0.64744	0.52954	0.92997		unclassified_Schleiferiaceae	-0.27239	-0.98069	0.34611	0.62834		unclassified_Microbacterium	-0.1888	-0.66598	0.51802	0.91987
g__Photobacterium	0.31039	1.4232	0.17088	0.45568		g__Wenzhouxiangella	-0.15738	-0.55205	0.59104	0.92394		unclassified_Pseudohongiella	-0.17067	-0.60001	0.55966	0.92997		unclassified_Gammaproteobacteria	-0.26409	-0.94849	0.36159	0.62834		s__Pararheinheimera_sp003990335	-0.18843	-0.66466	0.51884	0.91987
g__Pirellula_B	-0.014847	-0.064722	0.94907	0.98498		g__Catenovulum	0.1417	0.49586	0.62895	0.92394		unclassified_Schleiferiaceae	-0.16873	-0.59302	0.56418	0.92997		unclassified_Francisellaceae	-0.26343	-0.94597	0.36282	0.62834		unclassified_Halioglobus	-0.18458	-0.65059	0.52757	0.91987
g__Planctomicrobium	-0.0061781	-0.02693	0.9788	0.98498		unclassified_Ilumatobacteraceae	0.1311	0.4581	0.65507	0.92394		unclassified_Hyphomonas	-0.16435	-0.57718	0.57449	0.92997		unclassified_Parvularculaceae	-0.25625	-0.91835	0.37653	0.62834		s__Gimesia_sp007748015	-0.16811	-0.59075	0.56565	0.92399
g__Promineofilum	-0.35746	-1.6684	0.11164	0.35461		g__Arachnia	-0.12954	-0.45257	0.65893	0.92394		unclassified_Sorangium	-0.16352	-0.57417	0.57646	0.92997		unclassified_Rhodobacteraceae	0.25505	0.91372	0.37885	0.62834		unclassified_Bacteria	-0.16202	-0.56875	0.58001	0.92399
g__Prosthecobacter	-0.304	-1.3909	0.18032	0.46163		g__Actibacterium	-0.12734	-0.44475	0.66442	0.92394		unclassified_Phycisphaerales	-0.15841	-0.55577	0.58858	0.92997		unclassified_Halioglobus	-0.24071	-0.85909	0.40713	0.65916		unclassified_Muricauda	0.15555	0.54549	0.59541	0.92399
g__Pseudoalteromonas	-0.4442	-2.1612	0.043658	0.35461		g__Nitrosomonas	0.11229	0.39147	0.70231	0.92394		unclassified_Mesorhizobium	-0.15686	-0.55021	0.59227	0.92997		unclassified_Alphaproteobacteria	-0.22944	-0.81657	0.43009	0.66723		unclassified_Phycisphaerales	-0.15093	-0.5289	0.60652	0.92399
g__Pseudohongiella	-0.34576	-1.6062	0.12473	0.35725		g__Sorangium	-0.10883	-0.37924	0.71114	0.92394		unclassified_Lysobacter	-0.15291	-0.53601	0.60174	0.92997		unclassified_Muricauda	-0.22523	-0.8008	0.43881	0.66723		s__Ruegeria_sp013033515	-0.14754	-0.51674	0.61473	0.92399
g__Rheinheimera	-0.36474	-1.7075	0.10402	0.35461		g__Lysobacter	-0.10481	-0.36508	0.7214	0.92394		s__Pseudoalteromonas_spongiae	-0.14123	-0.4942	0.63009	0.95213		unclassified_Hyphomonas	-0.22	-0.78123	0.44981	0.66723		unclassified_Maribacter	-0.14441	-0.50555	0.62233	0.92399
g__Rhodopirellula_B	0.15538	0.68562	0.50124	0.72589		unclassified_Schleiferiaceae	-0.099269	-0.34559	0.73564	0.92394		unclassified_Gammaproteobacteria	-0.13154	-0.45965	0.65399	0.96676		unclassified_Phycisphaerales	-0.21483	-0.76198	0.46079	0.66723		s__Clostridium_butyricum	0.13776	0.48181	0.63861	0.92399
g__Roseibacillus	-0.35558	-1.6583	0.11367	0.35461		g__Thioclava	0.097009	0.33764	0.74147	0.92394		unclassified_Wenzhouxiangella	-0.12078	-0.42147	0.68086	0.98508		unclassified_Sorangium	-0.20837	-0.73803	0.47468	0.66723		unclassified_Ruegeria	-0.13775	-0.48176	0.63864	0.92399
g__Seonamhaeicola	-0.23012	-1.0307	0.31561	0.59409		g__Rhodopirellula_B	-0.091677	-0.31892	0.75527	0.92394		unclassified_Rhodopirellula_B	0.11184	0.38989	0.70345	0.99052		unclassified_Rhodopirellula_B	-0.20719	-0.73364	0.47726	0.66723		unclassified_Lewinella_A	0.13185	0.46078	0.65319	0.92536
g__Shewanella	-0.026418	-0.11519	0.9095	0.97013		g__Neptunomonas	0.088803	0.30884	0.76274	0.92394		s__Shewanella_khirikhana	0.10088	0.35124	0.7315	0.99052		unclassified_Pseudohongiella	-0.20556	-0.72762	0.4808	0.66723		unclassified_Tamlana_A	-0.11557	-0.40306	0.694	0.9343
g__Simiduia	-0.49258	-2.4672	0.023293	0.35461		g__Cryobacterium	0.086034	0.29914	0.76995	0.92394		unclassified_Akkermansiaceae	-0.097993	-0.3411	0.73893	0.99052		s__Ruegeria_sp009363615	-0.19758	-0.69819	0.49836	0.67777		unclassified_Thioclava	-0.11461	-0.39967	0.69642	0.9343
g__SWB02	-0.39972	-1.9008	0.072607	0.35461		g__Aliiroseovarius	0.062371	0.21648	0.83225	0.97505		unclassified_Formosa	-0.096458	-0.33571	0.74289	0.99052		s__Pseudomonas_A_balearica	-0.19155	-0.67605	0.51183	0.68244		unclassified_Nodosilinea	0.11292	0.39368	0.70073	0.9343
g__SZUA_309	-0.21746	-0.97112	0.34369	0.59826		unclassified_Akkermansiaceae	0.057558	0.19972	0.84505	0.97505		s__Gimesia_sp007748015	-0.082188	-0.28567	0.78	0.9964		s__Ruegeria_atlantica_A	0.14411	0.50446	0.62307	0.81479		unclassified_Gammaproteobacteria	-0.095195	-0.33127	0.74615	0.9583
g__SZUA_42	-0.12284	-0.53954	0.59578	0.73534		g__Gimesia	-0.047276	-0.16395	0.8725	0.98197		s__Aliiroseovarius_crassostreae	0.079854	0.27751	0.78611	0.9964		s__Neptunomonas_phycophila	-0.12662	-0.44217	0.66623	0.85479		s__Pseudomonas_A_balearica	0.094269	0.32802	0.74855	0.9583
g__SZUA_55	-0.3906	-1.8495	0.080001	0.35461		g__Clostridioides	0.038547	0.13363	0.89591	0.98197		s__Clostridioides_difficile	-0.077893	-0.27065	0.79126	0.9964		s__Gimesia_sp007748015	0.11231	0.39153	0.70227	0.88434		unclassified_Sphingomonadaceae	0.085802	0.29833	0.77056	0.9583
g__SZUA_592	-0.01072	-0.046729	0.96322	0.98498		g__Paracoccus	-0.035214	-0.12206	0.90487	0.98197		s__Pseudomonas_A_balearica	0.060685	0.21061	0.83673	0.99985		unclassified_Mesorhizobium	-0.090506	-0.31481	0.75831	0.90191		unclassified_Arachnia	-0.083204	-0.28923	0.77734	0.9583
g__T3Sed10_241	0.21099	0.94086	0.35859	0.6013		g__Muricauda	0.030894	0.10707	0.9165	0.98197		s__Neptunomonas_phycophila	-0.058324	-0.20238	0.84301	0.99985		unclassified_Wenzhouxiangella	-0.087484	-0.30422	0.76617	0.90191		unclassified_Francisellaceae	0.074901	0.2602	0.79912	0.9583
g__Tenacibaculum	-0.36679	-1.7186	0.10194	0.35461		g__Clostridium	-0.016351	-0.056649	0.95576	0.99467		unclassified_Thioclava	0.056055	0.19449	0.84905	0.99985		unclassified_Nitrosomonas	-0.082443	-0.28657	0.77933	0.90191		unclassified_Demequina	-0.073323	-0.25468	0.80328	0.9583
g__Tropicibacter	0.13878	0.61083	0.54855	0.73531		g__Pseudomonas_A	-0.0085775	-0.029714	0.97678	0.99467		unclassified_Rhodobacteraceae	0.048109	0.16685	0.87027	0.99985		unclassified_Cryobacterium	-0.079841	-0.27746	0.78615	0.90191		s__Winogradskyella_sp013394635	-0.059163	-0.20531	0.84077	0.97102
g__UBA1924	-0.20765	-0.9253	0.36642	0.6013		unclassified_Sedimenticolaceae	-0.0066516	-0.023042	0.982	0.99467		unclassified_Paracoccus	0.036033	0.1249	0.90267	0.99985		s__Clostridioides_difficile	-0.07717	-0.26813	0.79316	0.90191		unclassified_Nisaeaceae	0.054631	0.18953	0.85284	0.97102
g__UBA4421	-0.39771	-1.8894	0.074194	0.35461		unclassified_Rhodobacteraceae	0.0019696	0.006823	0.99467	0.99467		unclassified_Nitrosomonas	-0.031687	-0.10982	0.91437	0.99985		s__Actibacterium_pelagium	0.071421	0.24804	0.80829	0.90191		s__Pseudoalteromonas_spongiae	0.046666	0.16183	0.87413	0.97102
g__UBA8437	-0.19449	-0.86426	0.39823	0.63716								s__Ruegeria_atlantica_A	0.022235	0.077045	0.93986	0.99985		unclassified_Arachnia	-0.068956	-0.23944	0.81481	0.90191		unclassified_Emcibacteraceae	-0.039506	-0.13696	0.89333	0.97102
g__UJ101	0.68211	4.066	0.000659	0.021088								s__Clostridium_butyricum	-0.019865	-0.068828	0.94626	0.99985		unclassified_Ilumatobacteraceae	0.061897	0.21483	0.83351	0.90191		unclassified_Hyphomonas	-0.033494	-0.11609	0.9095	0.97102
g__Vibrio	1	Inf	0	0								unclassified_Sedimenticolaceae	0.018562	0.064313	0.94978	0.99985		unclassified_Demequina	-0.061111	-0.21209	0.8356	0.90191		unclassified_Lysobacter	0.029196	0.10118	0.92108	0.97102
Not_Assigned	-0.54457	-2.8302	0.010695	0.22817								unclassified_Ilumatobacteraceae	0.012949	0.044859	0.96496	0.99985		unclassified_Tropicimonas	0.052521	0.18219	0.85847	0.91213		s__Rhodobacter_capsulatus	0.025588	0.08867	0.93081	0.97102
												s__Actibacterium_pelagium	-0.004808	-0.016656	0.98698	0.99985		unclassified_Paracoccus	0.029844	0.10343	0.91933	0.96176		unclassified_Sorangium	0.020916	0.072472	0.94342	0.97102
												unclassified_Cryobacterium	0.0043261	0.014986	0.98829	0.99985		unclassified_Sedimenticolaceae	0.014317	0.049601	0.96126	0.9781		unclassified_Akkermansiaceae	-0.020122	-0.069719	0.94557	0.97102
												unclassified_Cyclobacteriaceae	0.0017165	0.005946	0.99535	0.99985		s__Catenovulum_sediminis	-0.011872	-0.041129	0.96787	0.9781		unclassified_Pseudohongiella	0.015986	0.055383	0.95674	0.97102
												s__Catenovulum_sediminis	-5.4463e-05	-0.00018867	0.99985	0.99985		s__Clostridium_butyricum	0.0080894	0.028023	0.9781	0.9781		unclassified_Sedimenticolaceae	-0.0012319	-0.0042674	0.99667	0.99667
